# Supplementary material for: An asymmetric allelic interaction drives allele transmission bias in interspecific rice hybrids
Source: PubMed Central journal article supplement (PMC6555797; doi:10.1038/s41467-019-10488-3), 2019-06-07
Supplement: 41467_2019_10488_MOESM1_ESM.pdf [file 41467_2019_10488_MOESM1_ESM.pdf]

1

2

3

4

5

6 **An asymmetric allelic interaction drives allele transmission bias in**

7 **interspecific rice hybrids**

8

9

*Xie et al*

10

11

12

13

14

15

16

17

18

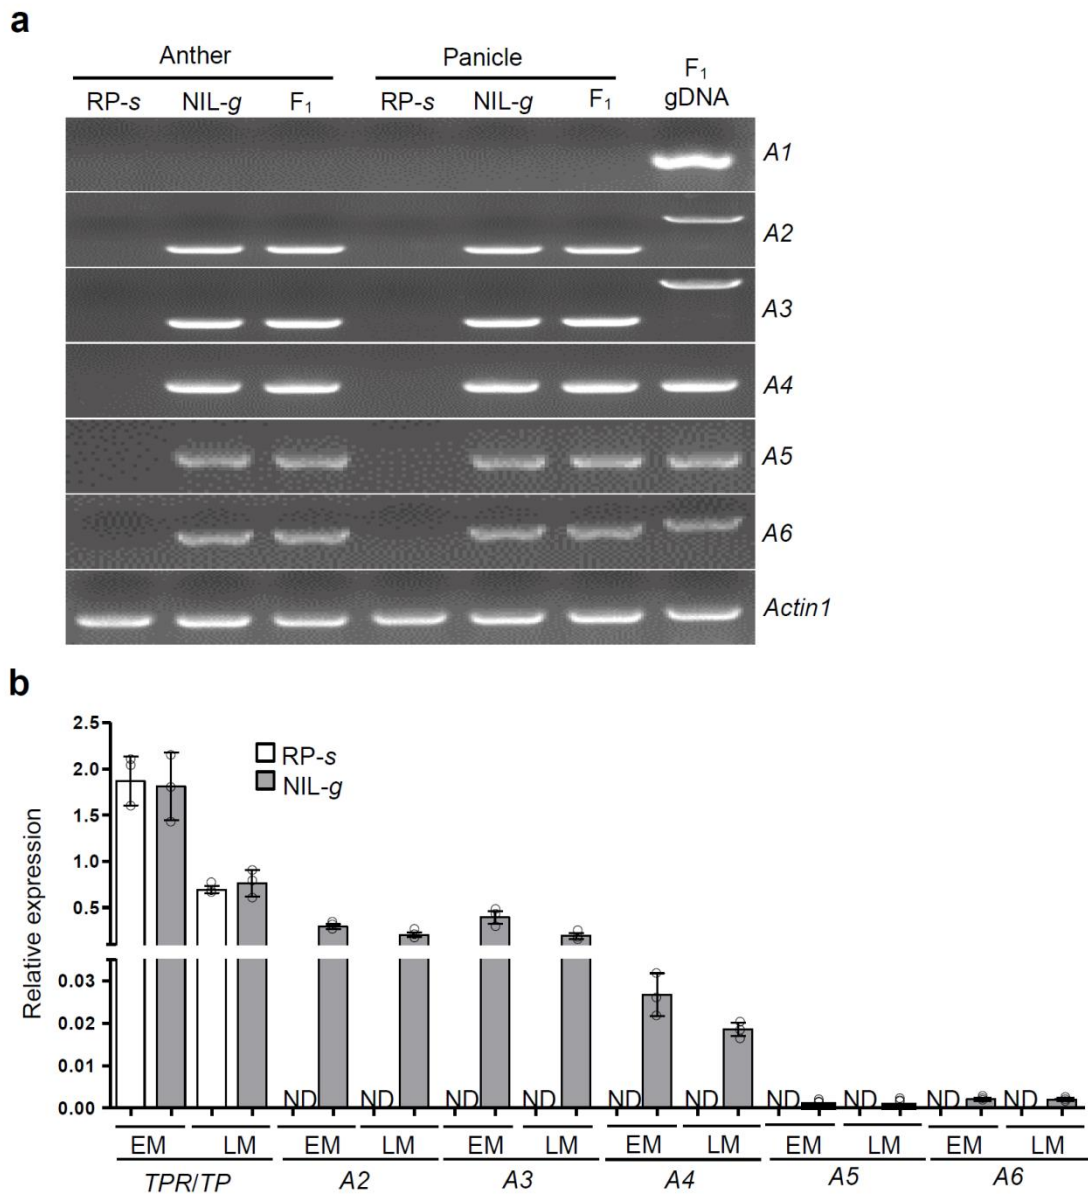

19 **Supplementary Figure 1. Expression analysis of candidate genes at the *SI* locus. (a)**

20 Expression analysis of the candidate genes *SIA1~SIA6* (*A1~A6*) in the anthers and

21 panicles using RT-PCR (32 cycles for target genes and 27 cycles for *OsActin1*). The

22 anthers were at the microspore mother cell stage to meiosis stage. (b) Expression

23 analysis of the candidate genes *SITPR* (*TPR*), *A2~A6* in microspores at different

24 developmental stages using qRT-PCR. ND, not detectable; EM, early microspore

25 stage; LM, late microspore stage. *OsActin1* serves as a reference. Data are mean  $\pm$

26 SD ( $n = 3$ ). Source data of Supplementary Figure 1b are provided as a Source Data

27 file.

28

29

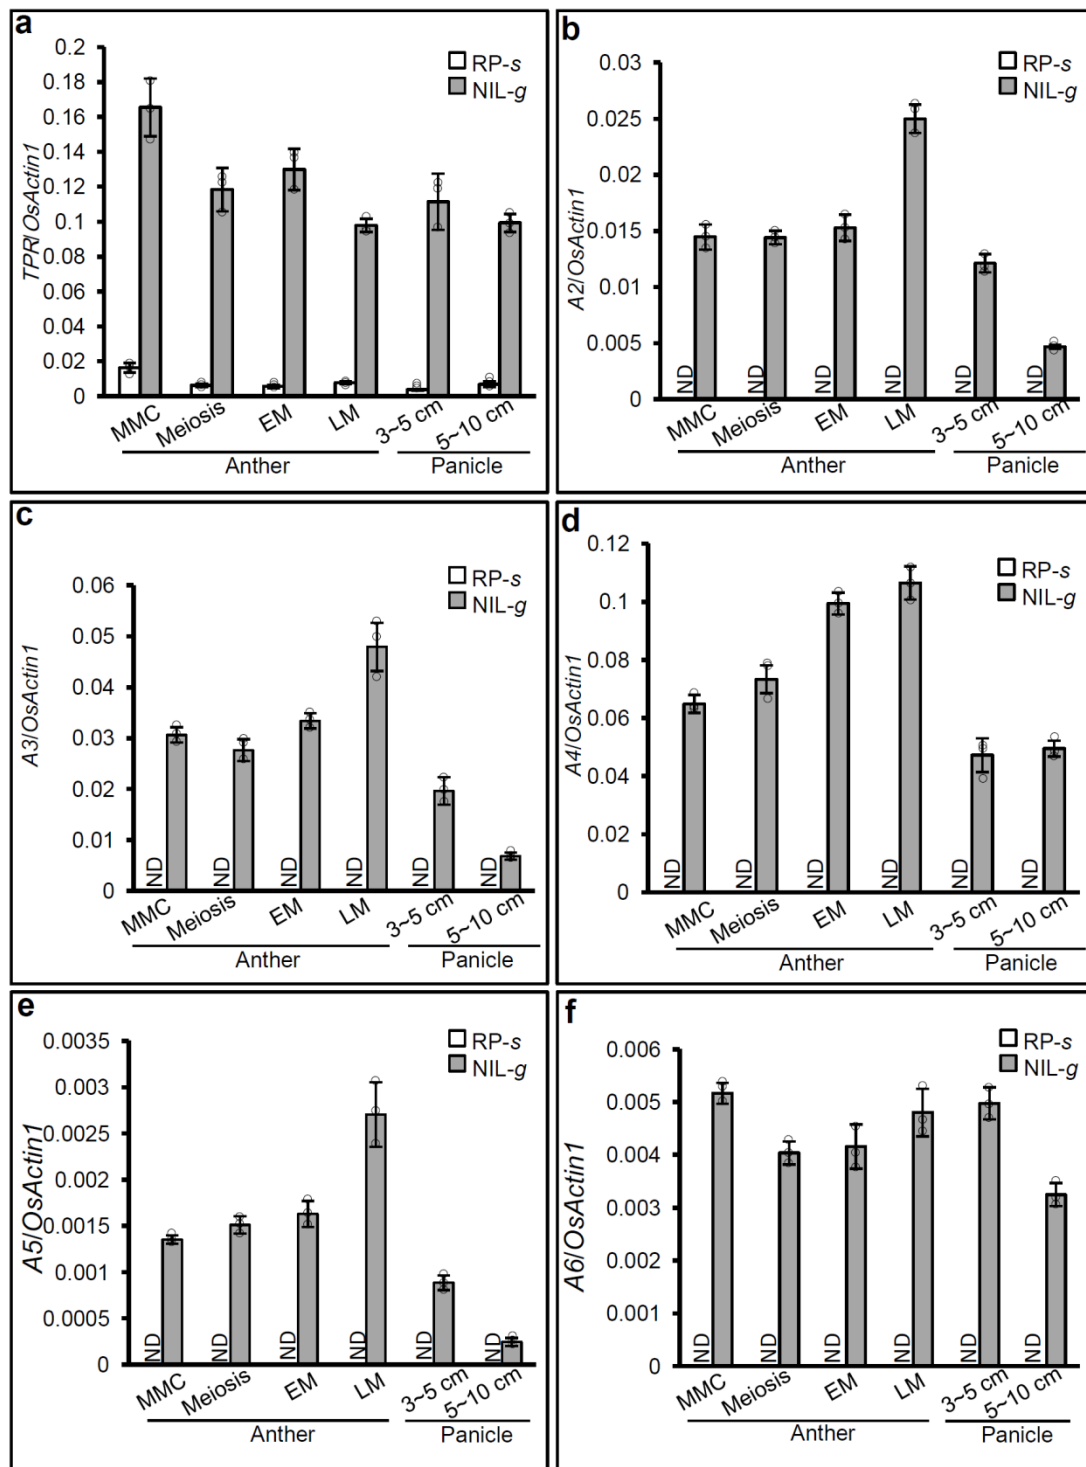

30

31 **Supplementary Figure 2. Expression analysis of the candidate genes in the *S1-g***  
 32 **mapping region.** Quantitative RT-PCR was used to quantify the expression levels of  
 33 *SITPR* (*TPR*) and *SIA2~SIA6* (*A2~A6*) in the anthers and panicles at different  
 34 reproductive stages, including the microspore mother cell (MMC), meiosis, early  
 35 microspore (EM), and late microspore (LM), and the young panicles 3~5 cm and

36 5~10 cm in length. ND, not detectable. Data are mean  $\pm$  SD ( $n = 3$ ). Source data are  
37 provided as a Source Data file.

38

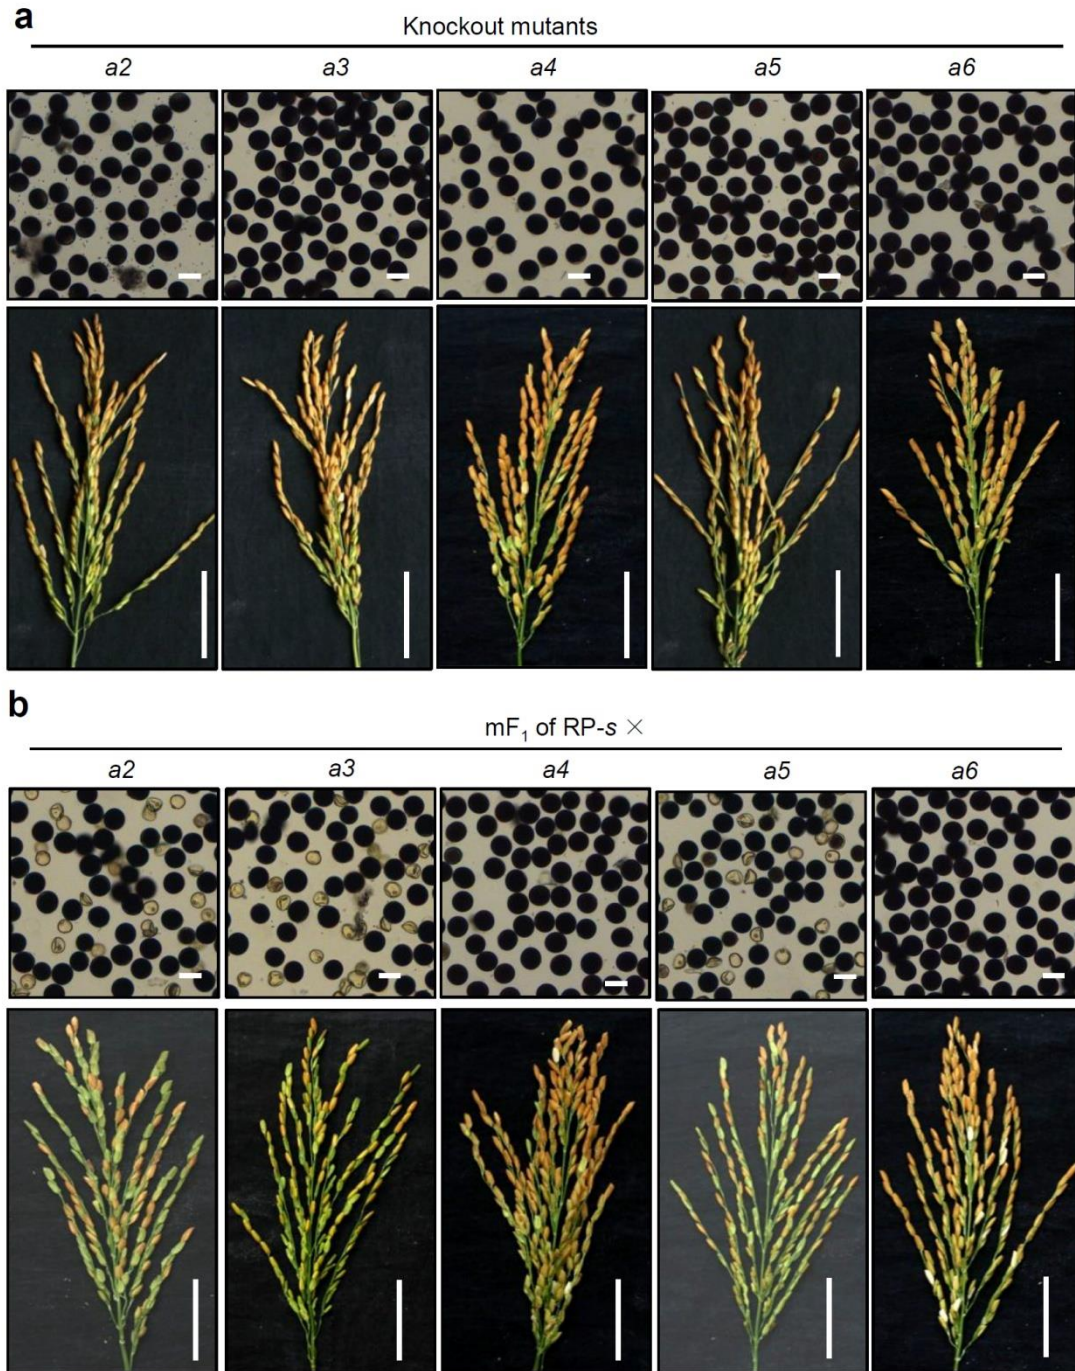

40 **Supplementary Figure 3. *SIA4* and *SIA6* are not essential for gamete**  
41 **development, but required for hybrid sterility. (a)** The pollen and spikelets of  
42 CRISPR/Cas9 knockout mutants *s1a2~s1a6* (*a2~a6*) in NIL-*g* had normal fertility. **(b)**  
43 The knockout of *SIA4* (*A4*) and *SIA6* (*A6*), but not *SIA2* (*A2*), *SIA3* (*A3*), and *SIA5*

44 (A5), eliminated *Sl*-mediated HS in the mutant hybrids (mF<sub>1</sub>). Bars represent 50  $\mu$ m  
45 for pollen and 5 cm for panicles.

46

47

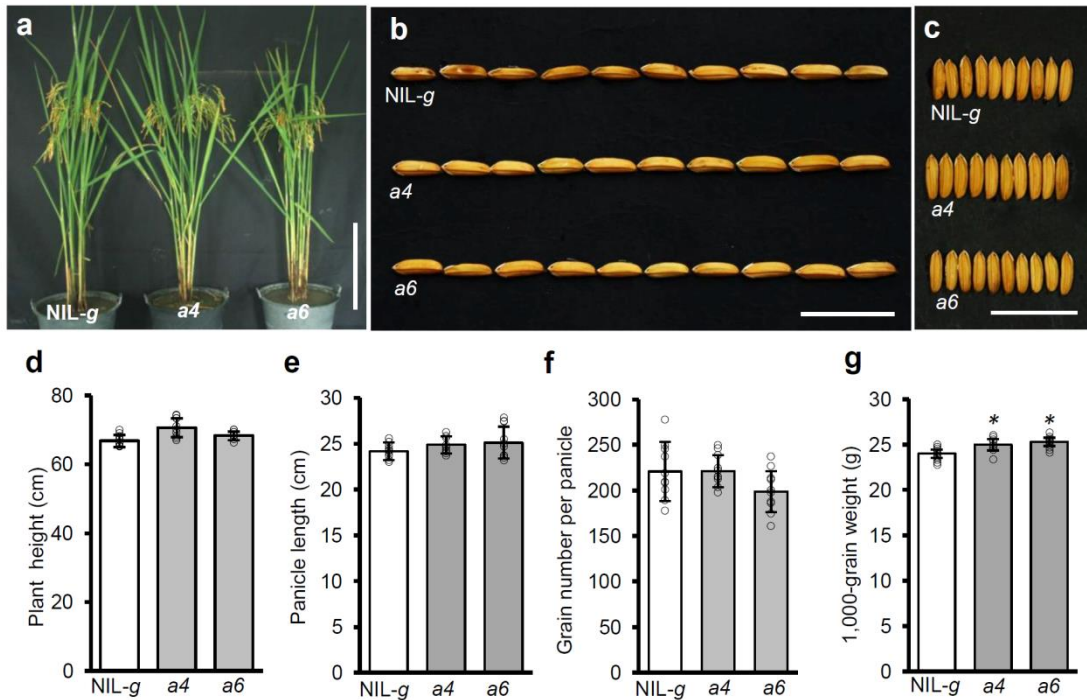

48

49 **Supplementary Figure 4. Agronomic traits in the *sla4* and *sla6* mutants.** (a) The

50 architecture of the *sla4* (*a4*) and *sla6* (*a6*) mutants. Bar = 30 cm. (b, c) Yield-related

51 traits of the *a4* and *a6* mutants. Bars = 2 cm. (b) Grain length. (c) Grain width. (d-g)

52 Statistical analyses of the plant height (d), panicle length (e), grain number per

53 panicle (f), and 1000-grain weight (g) of the *a4* and *a6* mutants. Data are mean  $\pm$

54 SD ( $n = 10$ ). \*, statistical significance at  $P < 0.05$  in Student's *t*-test. Source data of

55 Supplementary Figure 4d-4g are provided as a Source Data file.

56

57



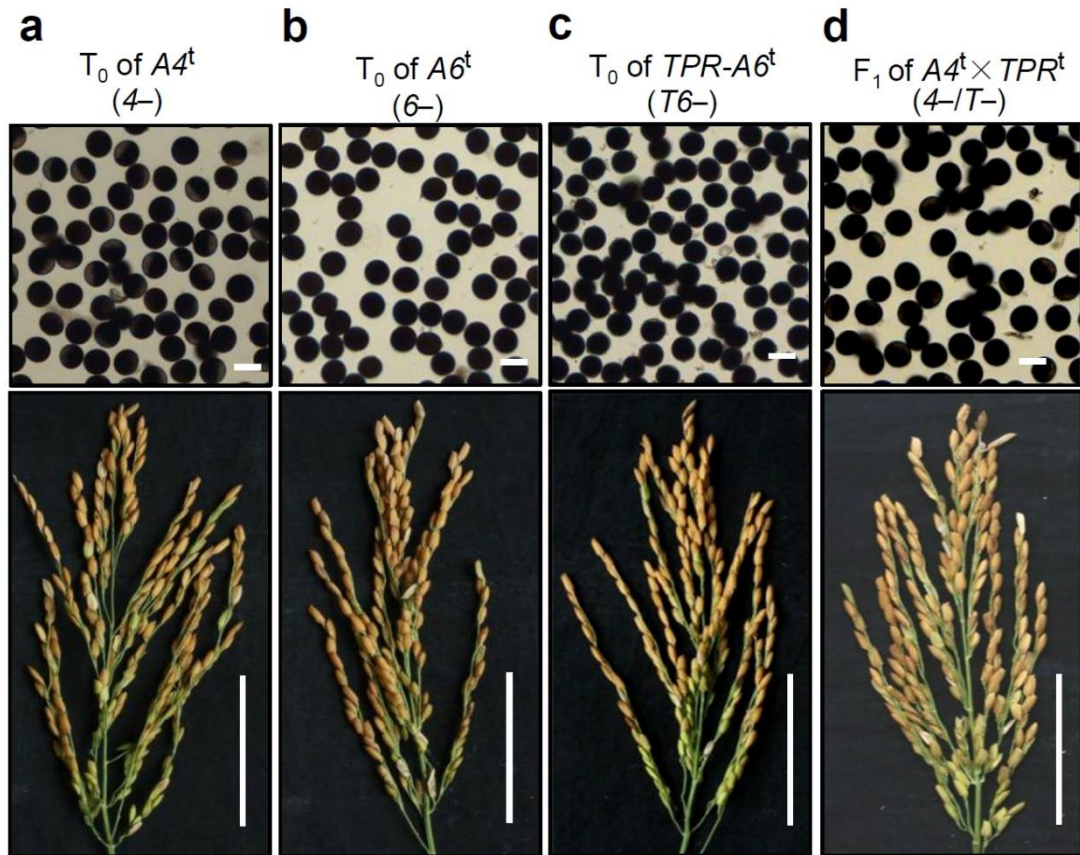

58

59 **Supplementary Figure 5. Phenotype of the transgenic plants containing one or**  
 60 **two *SIA4*, *SIA6*, and *SITPR* transgenes.** None of the *SIA4*<sup>t</sup> (*A4*<sup>t</sup>), *SIA6*<sup>t</sup> (*A6*<sup>t</sup>),  
 61 *SITPR-SIA6*<sup>t</sup> (*TPR-A6*<sup>t</sup>), or F<sub>1</sub> (*A4*<sup>t</sup> × *TPR*<sup>t</sup>) plants, in a hemizygous state, had sterile  
 62 pollen (top) or spikelets (bottom). Bars represent 50 μm for pollen and 5 cm for  
 63 panicles.

64

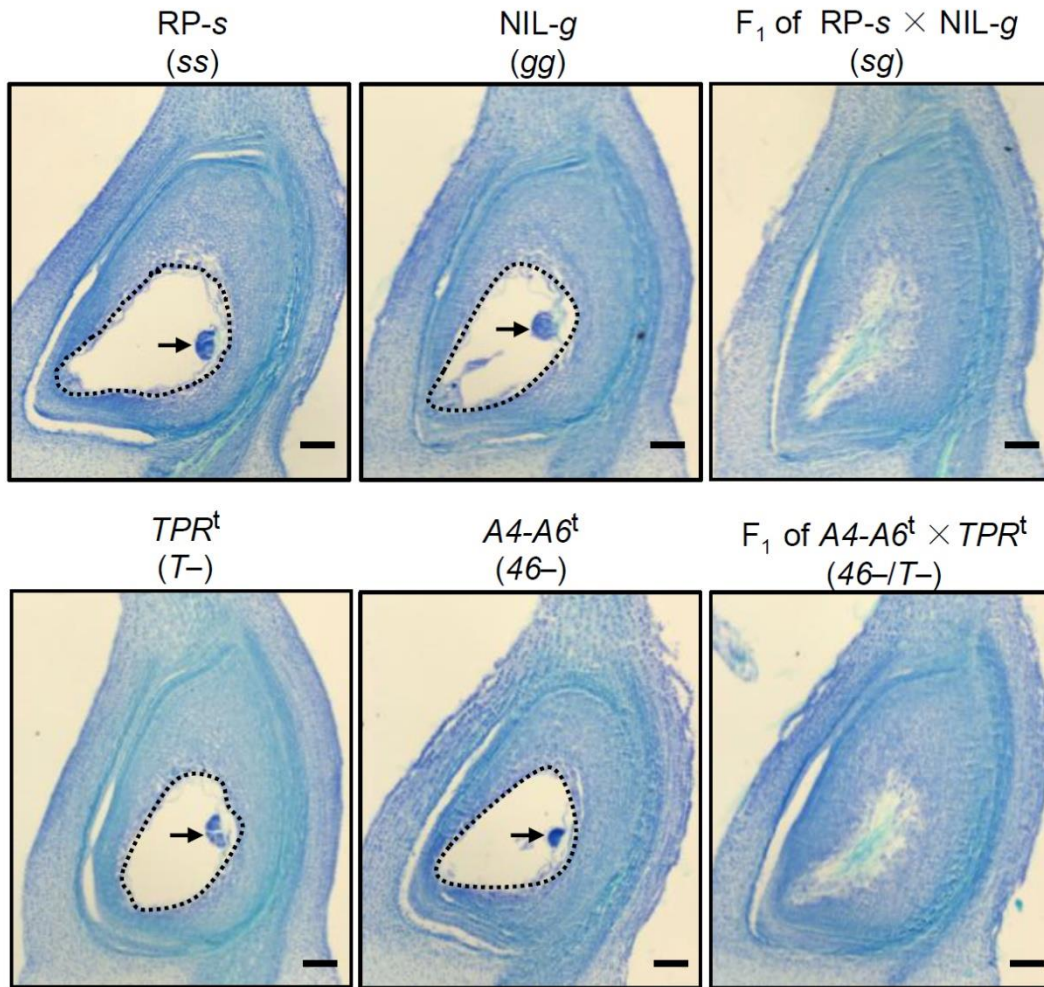

65

66 **Supplementary Figure 6. Longitudinal section of embryo sacs from different**  
 67 **genotypes.** The embryo sacs of F<sub>1</sub> plants derived from RP-s × NIL-g or *SIA4-SIA6*<sup>t</sup> ×  
 68 *SITPR*<sup>t</sup> (*A4-A6*<sup>t</sup> × *TPR*<sup>t</sup>) are abnormal. The dashed frames indicate the embryo sac and  
 69 the arrows indicate the antipodals. Scale bars = 50 μm.

70

**a**

```
1 ggggccaccc ccaaccctaa aacatttccc acccaccgcg cgcgccctt ctcgagtcgt
61 ctctctact tctcgacgtg cgcgggctcg acctcgctc ctccgccgcc ggccgccgta
121 ctctcgctt ctccctcgtt tccgggtgagt cgatctgctg ctgaggtcgt cttctccggc
181 tccggctctc gggttgcgag gtactaacct tttcacccta acggcctaac ctaaccctgg
241 atctacatct cgatctcgtt ctgatgcgtg tgctgtgctc cctcccttct tgttcatata
301 ggtctacctc gagcgggtgc ggcgcggcct ccttctctc ctctcctcc ggcttaaggc
361 acgttgacc ttgtccccct ctctctctcc tccgccgcta gatcgatcgg ttctgtggtc
421 gctcgctctg atggattgaa tcgaaggtta ggggtccatg cgtggaagta gtcctttgga
481 tccgcattgt ttctattcgt agatgggtga agtagtcctt tttttttttt gactaactca
541 tctggaagaga aaagatgttt ccaaacatca atagaagtag tcttttttat ctgtgccatt
601 tctgttctga tatgcttgcc atgcttgctg gatctgtttg tggcttaggt ggttgatctg
661 gagttgtagg gttgtgcttg tagtctgctc ttagatgagt tcttctcatg atctgctggg
721 tcttttggtt aggggttaagc tagatttgct cgtgatttta gattcgtctt tgtatatggt
781 acccttgctc atttatgatg ctgctgtctg ggtttatgct tttgatttgt ccaaccgatt
841 ttgtaagcat gtgctttacg tttgataggt ctgattgagt tgttgctgta cattggagta
901 gcataatc tctcaacta gtagctcttg gccttaacct tttcttttat gatactcttg
961 gccttaattt gaatctgcat gtgtaatcca atataaataa tgttccagg aaaatggcat
1021 cgaacataca atctgaagct gagtcagctc gtgatagagc ccaagaatcg gtggtgattg
1081 ttcgagtcaa tacagatcct aatgagtact gttgtggttg cgtagtcagg tccaagtttg
1141 ttgggggatc cggaaacaga accacactgg ttataacttc atctaagttt gtacagggtc
1201 gagagaacga tttgacgggt gttttctgga acaaaaaaga gttaaaggct acctttctta
1261 ggacacatgg tgcgttttgt ttactggcta ctgatttcta cctttggctc cagcctattc
1321 acttgttgga aggcaacgct gggctggaga attcgcgcac gttcatgcga gttccgctca
1381 accatagtag aaccgggtt gtgttcactt ataccagtag taggtcgggt gagtcgtacc
1441 cagttgaaac tccaaatcat gcagtaccaa atccacatga atacttcatg gtcagctgta
1501 gctattttca aaagaccagc aaaggagtca gcagattaac aggtgcccct gtattttgta
1561 cgggggatgc tgggacagct ggaaggacca ttggtatcat tttgcaggat tgtcgcctg
1621 caacaggttg ttcaggtgct gaatttaaag ttgcaactca tgcaagccat ctccagaagg
1681 tgctatcgat tcttgatcca ccagatccac cacaaaagag gaaccacaac cttagcgggg
1741 gtaagaagag gaaggctaca ggaagtgggg gaggaagagg aaggcggcaa agagtctagg
1801 ttgttgtag agaaaagttc tgatgagagg tggggtgaca agaatgtctg tcattttggt
1861 gctgtatccc aactattaca attcatctct tagtctataa tgcactatgt atccgttcta
1921 tcattataac ttatcaattt gcgggcttag tctttaatgc caaa
```

**b**

```
1 MASNIQSEAE SARDRAQESV VIVRVNTDPN EYCCGCVVRS KFGVGGSGNRT TLVITSSKFV
61 QGRENDLTVV FWNKKEKAT FLRTHGAFCL LATDFYLWCQ PIHLLEGNAG LENSRTFMRV
121 PLNHSTTRFV FTYTSSRSVE SYPVETPNHA VPNSHEYFMV SCSYFQKTSK GVSRLTGAPV
181 FCTGDAGTAG RTIGIILQDC RPATGCSGAE FKVALNASHL QKVLSILDPP DPPQKRNNHL
241 SGGKKRKATG SGGGRGRRQR V.
```

71

72 **Supplementary Figure 7. Nucleotide and amino acid sequences of *SIA4*. (a)** The  
73 transcript of *SIA4* (*A4*) has three exons (red), with the coding sequence located in the  
74 third exon. The start (ATG) and stop (TAG) codons are marked in blue. (b) The  
75 deduced protein sequence of *A4*.

76



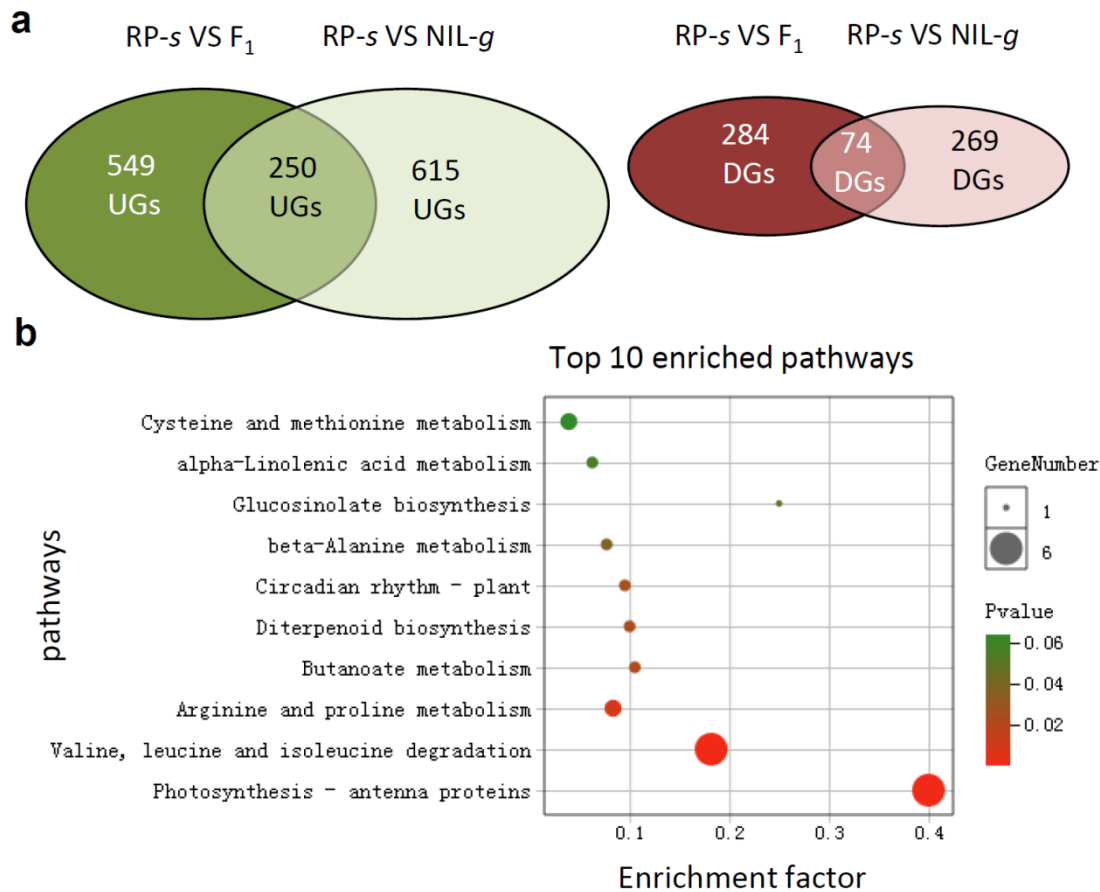

77

78 **Supplementary Figure 8. Transcriptome analysis of anthers from different**

79 **genotypes. (a)** Venn diagram showing the upregulated genes (UGs) and

80 downregulated genes (DGs) in the anthers of F<sub>1</sub> and NIL-g in comparison with RP-s,

81 including those commonly up- or downregulated in both genotypes. The anthers were

82 analyzed between the microspore mother cell stage and the meiosis stage. **(b)** The

83 common UGs and DGs were annotated using the KEGG pathway database. Six genes

84 involved in branched-chain amino acid (BCAA; i.e., valine, leucine, and isoleucine)

85 degradation and six genes involved in photosynthesis were significantly upregulated

86 in the anthers of F<sub>1</sub> and NIL-g relative to RP-s. Source data are provided as a Source

87 Data file.

88

89

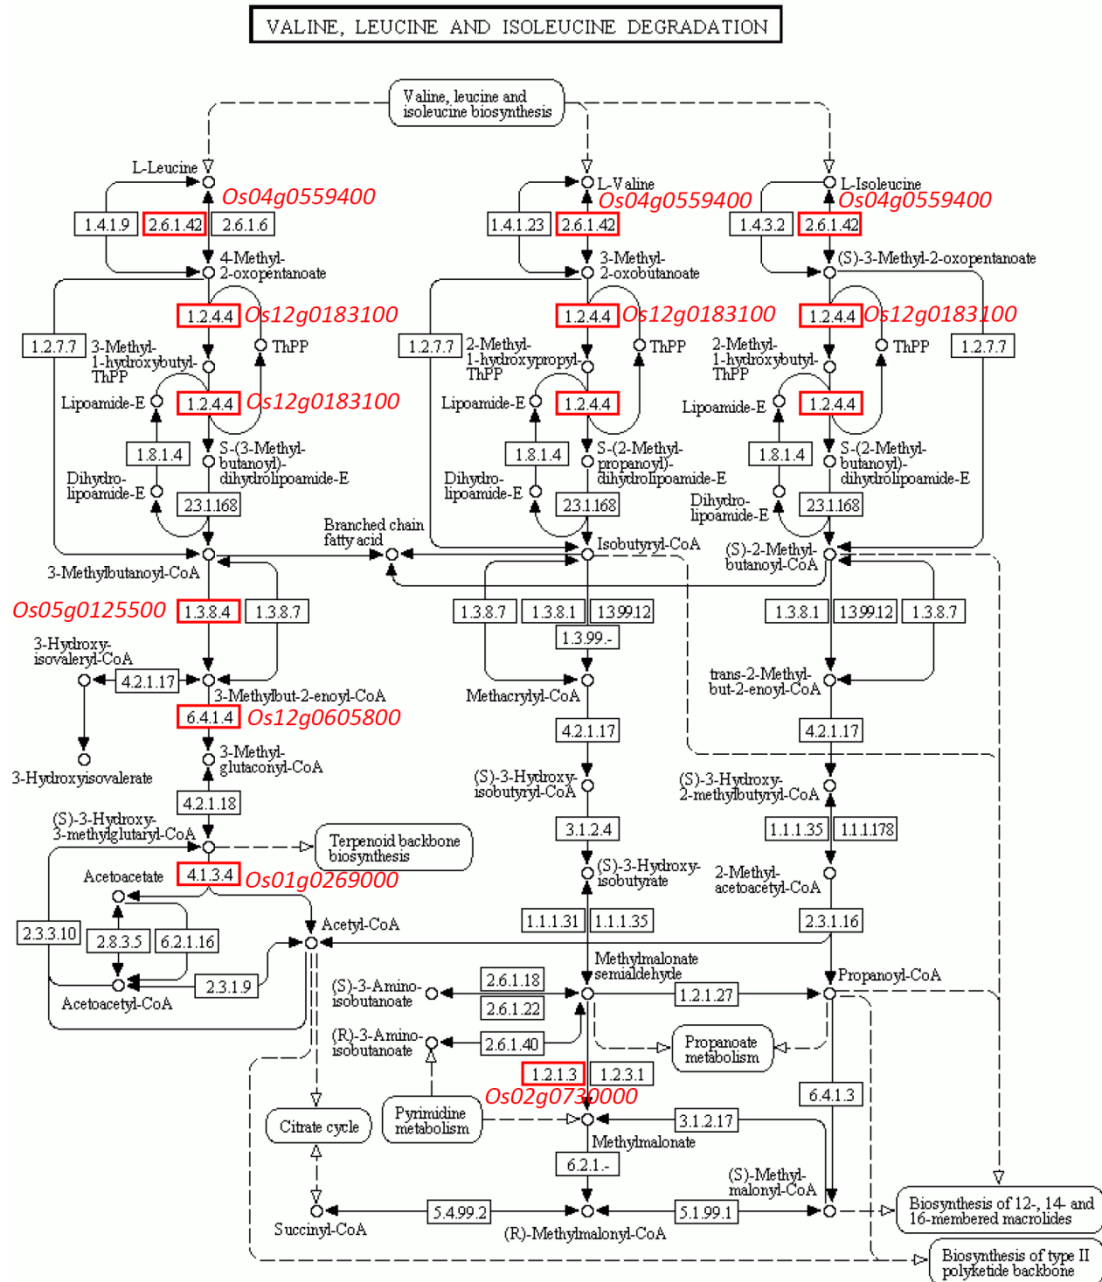

90

91 **Supplementary Figure 9. Degradation pathway of valine, leucine, and isoleucine**  
 92 **(branched-chain amino acids, BCAAs) in the KEGG database. The upregulated**  
 93 **genes involved in the BCAA degradation pathway are marked in red.**

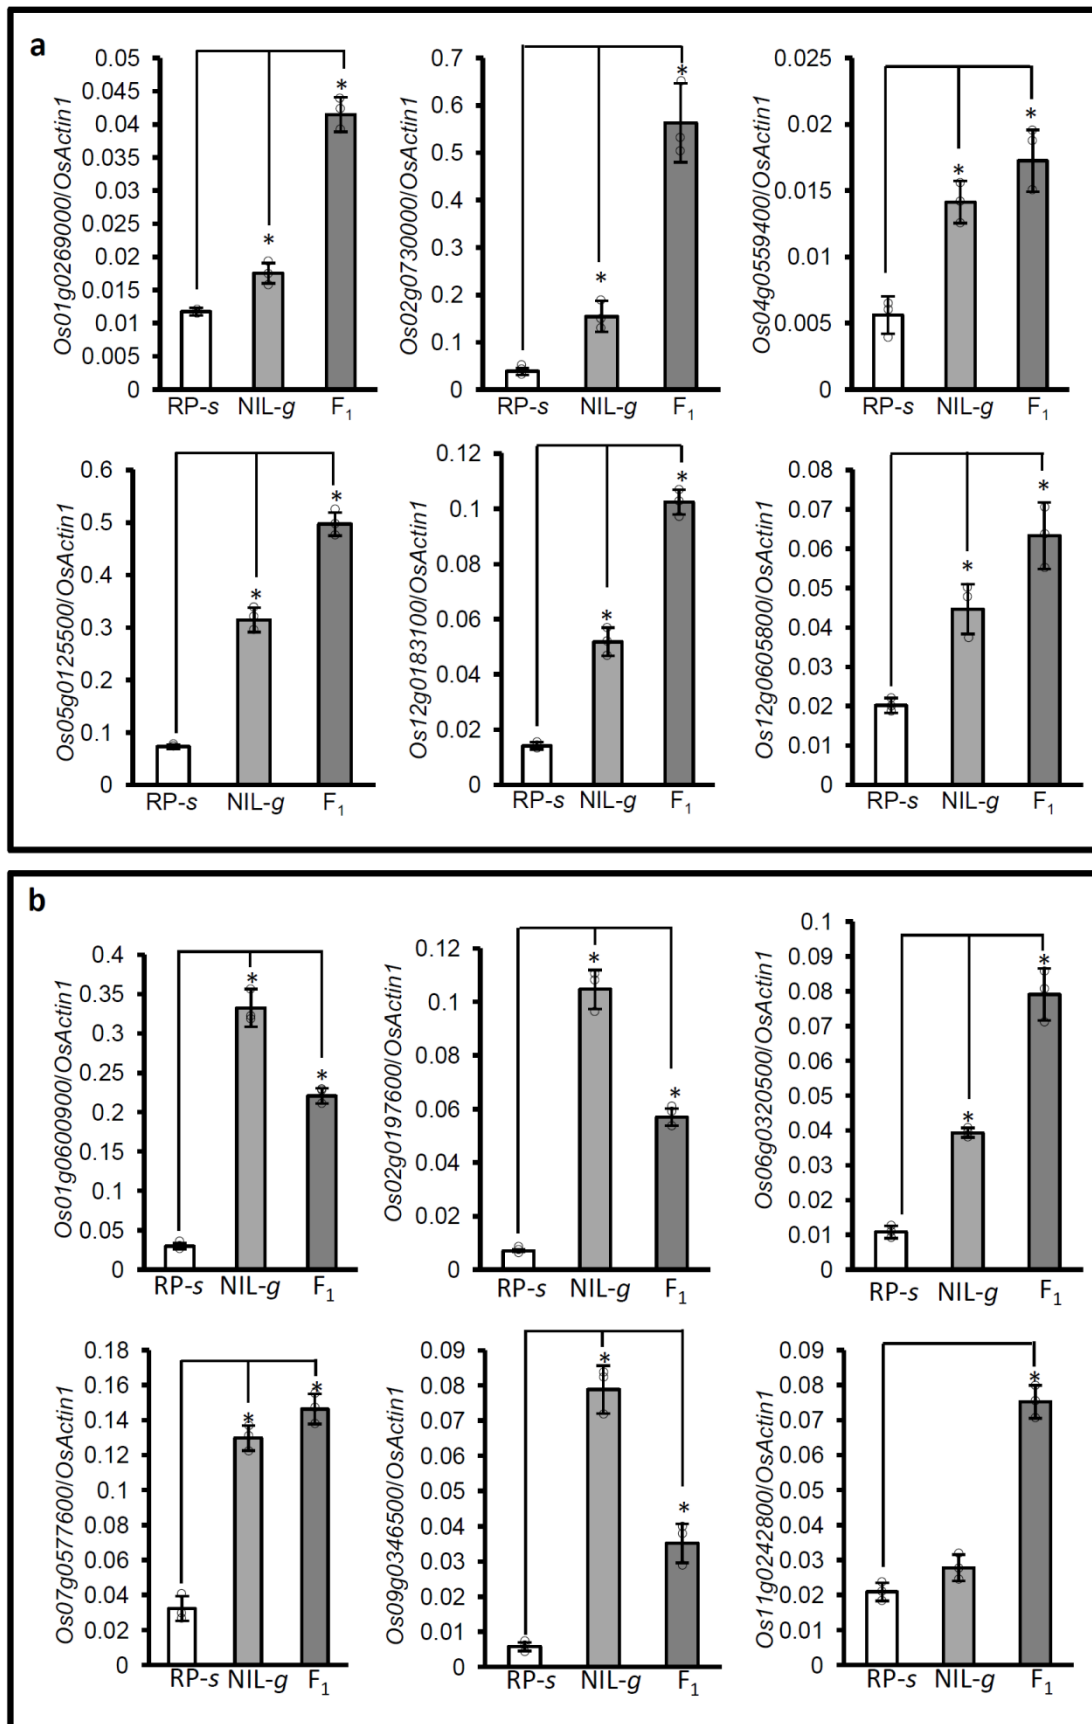

94

95 **Supplementary Figure 10. Validation of differentially expressed genes using**  
 96 **qRT-PCR.** Expression analysis of the genes involved in branched-chain amino acid

97 (BCAA) degradation (a) and the photosynthesis (b) pathways that were upregulated  
 98 in the anthers of NIL-*g* and F<sub>1</sub> relative to RP-*s*. The anthers were analyzed between  
 99 the microspore mother cell stage and the meiosis stage. *OsActin1* serves as an internal  
 100 reference gene. Data are mean  $\pm$  SD ( $n = 3$ ). \*, statistical significance at  $P < 0.05$  in  
 101 Student's *t*-test. Source data of Supplementary Figure 10 are provided as a Source  
 102 Data file.

103

104

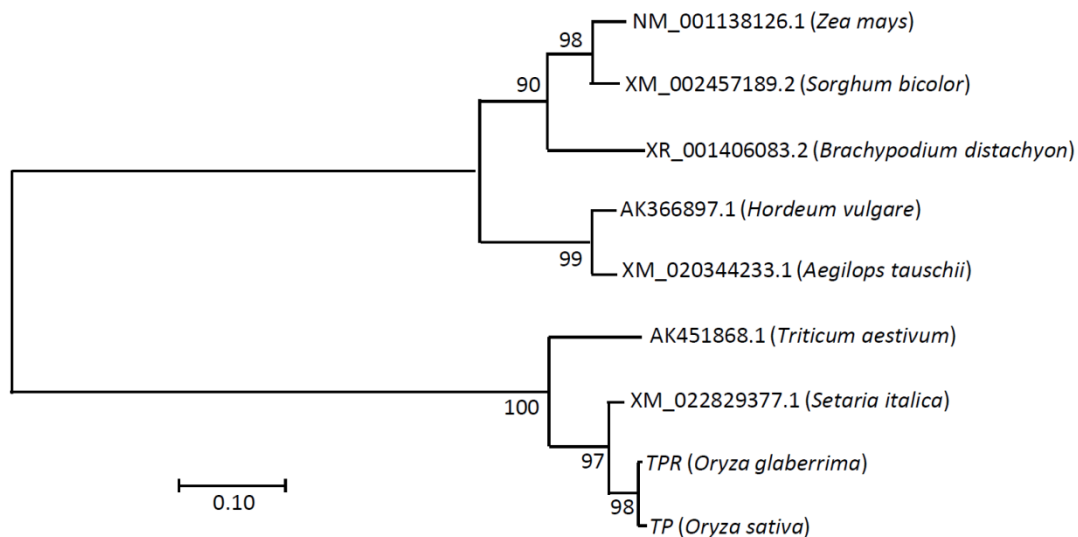

105

106 **Supplementary Figure 11. Phylogenetic tree of the putative *SI* locus *SITPR* (TPR)**

107 **orthologs in the Poaceae.** The putative orthologs were identified by searching the

108 Poaceae sequences in the NCBI database using the nucleotide coding sequence of

109 *SITPR* to construct a phylogenetic tree. The bootstrap values indicate the percentage

110 of support from 1,000 sampled trees. The scale bar indicates the number of nucleotide

111 substitutions per site.

112

113



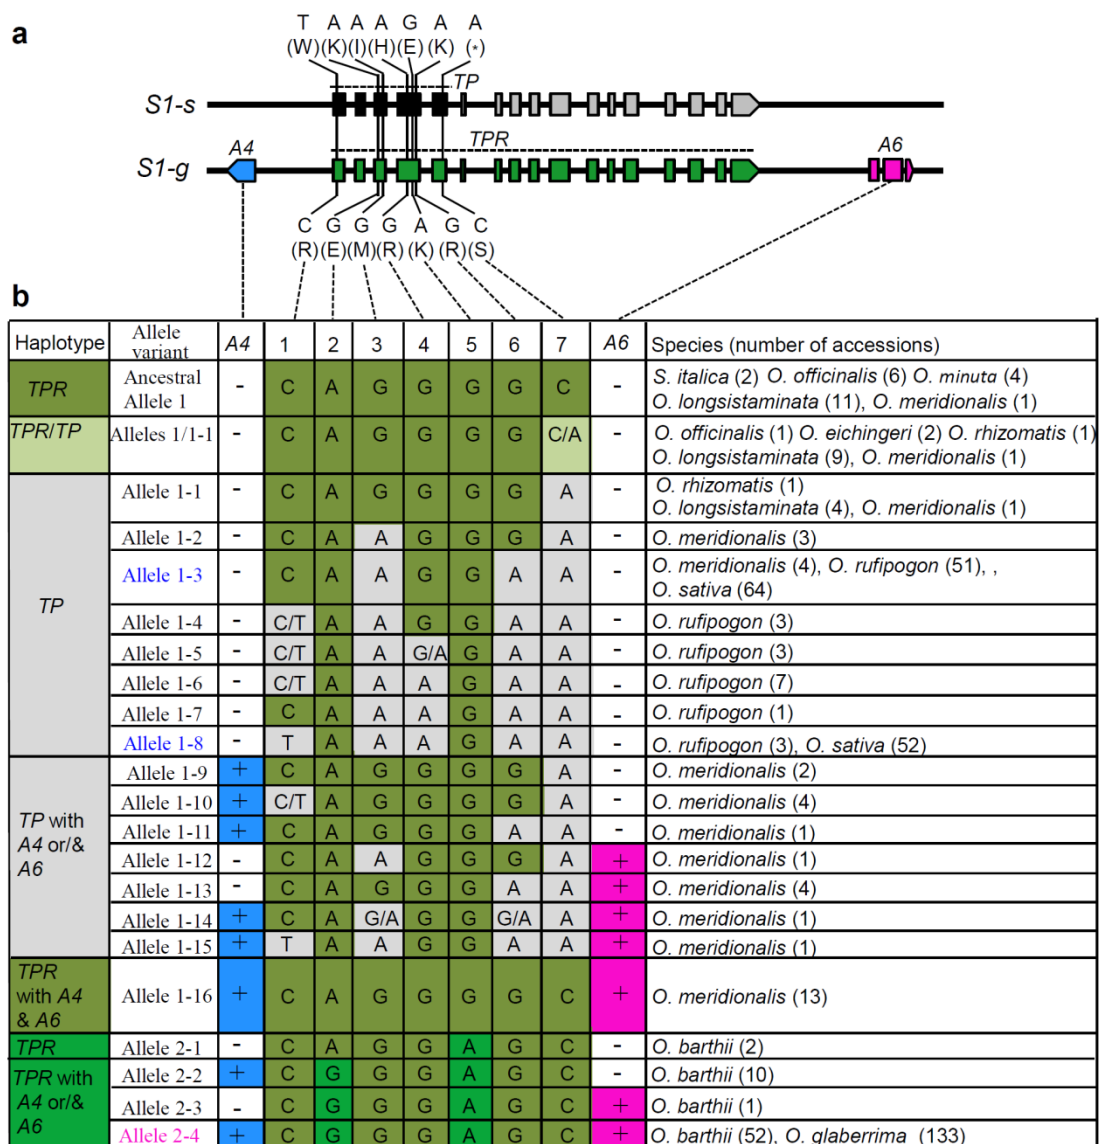

114

115 **Supplementary Figure 12. Gene structures of the *S1* alleles and the haplotypes**  
 116 **and allele variations in the *Oryza* species.** + and - indicate the presence and absence,  
 117 respectively, of the genes *SIA4* (A4) and *SIA6* (A6). \* in *SITP* (*TP*) indicates the  
 118 premature stop codon caused by the C-to-A mutation. The numbers of accessions  
 119 carrying the alleles are indicated in parentheses.

120

121

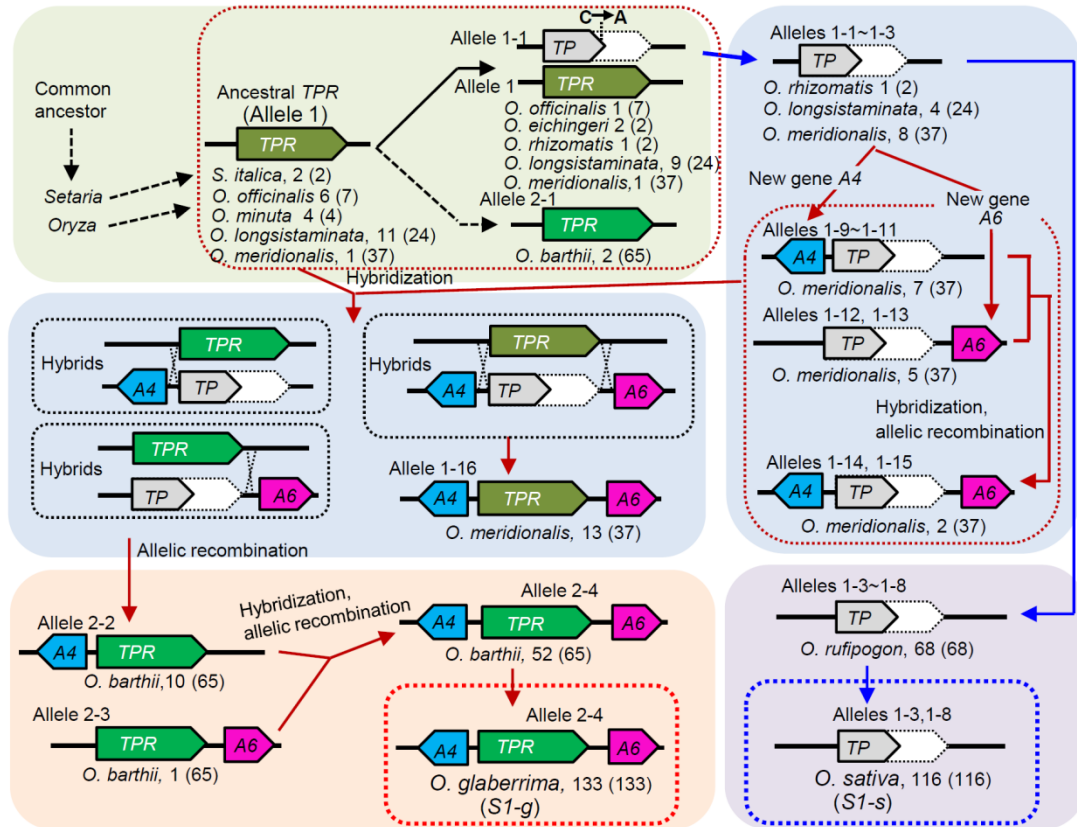

122

123 **Supplementary Figure 13. Evolution of the *SI* allele variants in *Oryza*.** An  
 124 ancestral primitive *SITPR* (*TPR*) structure (Allele 1), which lacked the flanking genes  
 125 *SIA4* (*A4*) and *SIA6* (*A6*), was detected in both analyzed accessions of an outgroup  
 126 species, *Setaria italica*, and some accessions of *Oryza* wild species (the total number  
 127 of investigated accession is in parentheses). The primary *SITP* (*TP*) (Allele 1-1) was  
 128 detected in the heterozygous state (Allele 1/Allele 1-1) in some accessions of wild  
 129 *Oryza* species. In one lineage, some of the resultant *TP* alleles (Alleles 1-1 to 1-16)  
 130 passed through a bottleneck and migrated into *O. rufipogon*, with two (Alleles 1-3 and  
 131 1-8) eventually being fixed as the current *SI-s* alleles in *O. sativa*. In another lineage,  
 132 the new genes *A6* and *A4* arose upstream and downstream of *TP*, respectively, to  
 133 generate the *A4-TP* and *TP-A6* structures. The new structure *A4-TP-A6* was likely  
 134 eventually generated by recombination between *A4-TP* and *TP-A6* during natural  
 135 hybridization among the ancestral wild species. The three-gene structure was  
 136 generated in *O. barthii*, and further migrated into *O. glaberrima* where it formed the  
 137 functional *SI-g* allele.

138

139

140

**Supplementary Table 1. CRISPR/Cas9-edited *a2~a6* mutants in *Sl-g*.**

| Lines       | Edited targets                        |
|-------------|---------------------------------------|
| A2-WT       | GAGGCTACGATGCGGGCAGTCGG               |
| <i>a2-1</i> | GAGGCTACGATGC- <b>168 bp DEL</b> -GGG |
| <i>a2-2</i> | GAGGCTACGATGCGGGC <b>T</b> AGTCGG     |
| A3-WT       | AATAATCATCTCGGTGCAACTGG               |
| <i>a3-1</i> | AATAATCATCTCGGTGC- <b>ACTGG</b>       |
| <i>a3-2</i> | AATAATCATCTCGGTGCA <b>AA</b> ACTGG    |
| A4-WT       | TGATAGAGCCCAAGAATCGGTGG               |
| <i>a4-1</i> | TGATAGAGCCCAAGAAT <b>T</b> CGGTGG     |
| <i>a4-2</i> | TGATAGAGCCCAAGAAT- <b>GGTGG</b>       |
| A5-WT       | CAATTGCAGGGCGTACGATCTGG               |
| <i>a5-1</i> | CAATTGCAGGGCGTACGA <b>A</b> TCTGG     |
| <i>a5-2</i> | CAATTGCAGGGCGTAC- <b>ATCTGG</b>       |
| A6-WT       | AGACGAGCGCTGAGCTCGCAAGG               |
| <i>a6-1</i> | AGACGA- <b>19 bp DEL</b> -CGCGGTGCTCA |
| <i>a6-2</i> | AGACGAGCGCTGAGCTC <b>T</b> GCAAGG     |

141 Notes: mutations in the *sla2~sla6* (*a2~a6*) alleles are shown in bold. The PAM sequences are  
 142 underlined.

143

144

145

146

147

148

149

150

151

152

153

154

155

156

157

158

159

160

161

162

163

164

165

166

167

168  
169

**Supplementary Table 2. Segregation analysis of the *SI* locus in the mF<sub>2</sub> populations derived from the cross RP-*s* × *a2~a6*.**

| mF <sub>2</sub> family           | <i>SI</i> locus genotype          | No. of plants | Pollen fertility | Spikelet fertility | $\chi^2$ (1:2:1) |
|----------------------------------|-----------------------------------|---------------|------------------|--------------------|------------------|
| <u>RP-<i>s</i> × <i>a2-1</i></u> | <i>g<sup>m</sup>g<sup>m</sup></i> | 146           | FF               | FF                 | 348.84***        |
|                                  | <i>g<sup>m</sup>s</i>             | 21            | SS               | SS                 |                  |
|                                  | <i>ss</i>                         | 0             | -                | -                  |                  |
| RP- <i>s</i> × <i>a2-2</i>       | <i>g<sup>m</sup>g<sup>m</sup></i> | 154           | FF               | FF                 | 364.93***        |
|                                  | <i>g<sup>m</sup>s</i>             | 23            | SS               | SS                 |                  |
|                                  | <i>ss</i>                         | 0             | -                | -                  |                  |
| <u>RP-<i>s</i> × <i>a3-1</i></u> | <i>g<sup>m</sup>g<sup>m</sup></i> | 138           | FF               | FF                 | 281.49***        |
|                                  | <i>g<sup>m</sup>s</i>             | 35            | SS               | SS                 |                  |
|                                  | <i>ss</i>                         | 0             | -                | -                  |                  |
| RP- <i>s</i> × <i>a3-2</i>       | <i>g<sup>m</sup>g<sup>m</sup></i> | 130           | FF               | FF                 | 249.00***        |
|                                  | <i>g<sup>m</sup>s</i>             | 39            | SS               | SS                 |                  |
|                                  | <i>ss</i>                         | 0             | -                | -                  |                  |
| <u>RP-<i>s</i> × <i>a4-1</i></u> | <i>g<sup>m</sup>g<sup>m</sup></i> | 45            | FF               | FF                 | 0.10             |
|                                  | <i>g<sup>m</sup>s</i>             | 93            | FF               | FF                 |                  |
|                                  | <i>ss</i>                         | 48            | FF               | FF                 |                  |
| RP- <i>s</i> × <i>a4-2</i>       | <i>g<sup>m</sup>g<sup>m</sup></i> | 47            | FF               | FF                 | 0.43             |
|                                  | <i>g<sup>m</sup>s</i>             | 97            | FF               | FF                 |                  |
|                                  | <i>ss</i>                         | 43            | FF               | FF                 |                  |
| <u>RP-<i>s</i> × <i>a5-1</i></u> | <i>g<sup>m</sup>g<sup>m</sup></i> | 122           | FF               | FF                 | 297.13***        |
|                                  | <i>g<sup>m</sup>s</i>             | 16            | SS               | SS                 |                  |
|                                  | <i>ss</i>                         | 0             | -                | -                  |                  |
| RP- <i>s</i> × <i>a5-2</i>       | <i>g<sup>m</sup>g<sup>m</sup></i> | 121           | FF               | FF                 | 286.99***        |
|                                  | <i>g<sup>m</sup>s</i>             | 18            | SS               | SS                 |                  |
|                                  | <i>ss</i>                         | 0             | -                | -                  |                  |
| <u>RP-<i>s</i> × <i>a6-1</i></u> | <i>g<sup>m</sup>g<sup>m</sup></i> | 49            | FF               | FF                 | 0.19             |
|                                  | <i>g<sup>m</sup>s</i>             | 103           | FF               | FF                 |                  |
|                                  | <i>ss</i>                         | 48            | FF               | FF                 |                  |
| RP- <i>s</i> × <i>a6-2</i>       | <i>g<sup>m</sup>g<sup>m</sup></i> | 55            | FF               | FF                 | 1.29             |
|                                  | <i>g<sup>m</sup>s</i>             | 130           | FF               | FF                 |                  |
|                                  | <i>ss</i>                         | 66            | FF               | FF                 |                  |

170 Notes: The *SI-g<sup>m</sup>* (*g<sup>m</sup>*) allele contained a mutated gene *s1a2~s1a6* (*a2~a6*) in *SI-g*. \*\*\*,  
 171 significance at  $P < 0.001$  in the Chi-square test. Two independent knockout mF<sub>2</sub> families were  
 172 analyzed for each gene, and the underlined crosses are shown in Supplementary Fig. 3. Source  
 173 data are provided as a Source Data file.



174 **Supplementary Table 3. Segregation analysis of  $TPR^t$  in the  $T_1$  generation.**

| $T_1$ line  | <i>SI</i><br>genotype | $TPR^t$<br>genotype | No. of<br>plants | Pollen<br>fertility | Spikelet<br>fertility | $\chi^2$<br>(1:2:1) |
|-------------|-----------------------|---------------------|------------------|---------------------|-----------------------|---------------------|
| $TPR^t\#13$ | <i>ss</i>             | <i>TT</i>           | 65               | FF                  | FF                    | 0.29                |
|             |                       | <i>T-</i>           | 120              | FF                  | FF                    |                     |
|             |                       | <i>--</i>           | 63               | FF                  | FF                    |                     |
| $TPR^t\#18$ | <i>ss</i>             | <i>TT</i>           | 59               | FF                  | FF                    | 1.43                |
|             |                       | <i>T-</i>           | 142              | FF                  | FF                    |                     |
|             |                       | <i>--</i>           | 67               | FF                  | FF                    |                     |

175 Notes:  $\chi^2$  (1:2:1) test was performed for the segregation of the transgene *SITPR<sup>t</sup>* ( $TPR^t$ ). *T* and *-*,  
176 presence and absence of the transgene, respectively; FF, fully fertile (> 90%). Two independent  
177 transgenic lines were analyzed, and the segregation data of  $TPR^t\#13$  are shown in Fig. 1e. Source  
178 data are provided as a Source Data file.

179

180

181

182

183

184

185

186

187

188

189

190

191

192

193

194

195

196

197 **Supplementary Table 4. Segregation analysis of *A4-A6<sup>t</sup>* in the *T<sub>1</sub>* generation.**

| <i>T<sub>1</sub></i> generation | <i>SI</i> locus genotype | <i>A4-A6<sup>t</sup></i> genotype | No. of plants | Pollen fertility | Spikelet fertility | $\chi^2$ (1:2:1) |
|---------------------------------|--------------------------|-----------------------------------|---------------|------------------|--------------------|------------------|
| <i>A4-A6<sup>t</sup></i> #19    | <i>ss</i>                | <i>4646</i>                       | 48            | FF               | FF                 | 0.18             |
|                                 |                          | <i>46-</i>                        | 97            | FF               | FF                 |                  |
|                                 |                          | <i>--</i>                         | 45            | FF               | FF                 |                  |
| <i>A4-A6<sup>t</sup></i> #11    | <i>ss</i>                | <i>4646</i>                       | 54            | FF               | FF                 | 0.75             |
|                                 |                          | <i>46-</i>                        | 105           | FF               | FF                 |                  |
|                                 |                          | <i>--</i>                         | 46            | FF               | FF                 |                  |

198 Note: Two independent transgenic lines were analyzed, and the segregation data of  
 199 *SIA4-SIA6<sup>t</sup>*#19 (*A4-A6<sup>t</sup>*#19) are shown in Fig. 1e. Source data are provided as a Source Data  
 200 file.

201

202

203

204

205

206

207

208

209

210

211

212

213

214

215

216

217

218

219

220  
221

**Supplementary Table 5. The segregation analysis of *TPR* in F<sub>2</sub> populations derived from the cross *A4-A6*<sup>t</sup> × *TPR*<sup>t</sup>.**

| F <sub>2</sub> family                                          | <i>A4-A6</i> <sup>t</sup><br>genotype | <i>TPR</i> <sup>t</sup><br>genotype | No. of<br>plants | Pollen<br>fertility | Spikelet<br>fertility | $\chi^2_{(46)}$<br>(1:2:1) | $\chi^2_{(T)}$<br>(1:2:1) |
|----------------------------------------------------------------|---------------------------------------|-------------------------------------|------------------|---------------------|-----------------------|----------------------------|---------------------------|
| <i>A4-A6</i> <sup>t</sup> #19 ×<br><i>TPR</i> <sup>t</sup> #13 | 4646                                  | <i>TT</i>                           | 55               | FF                  | FF                    | 0.20                       | 397.73***                 |
|                                                                |                                       | <i>T-</i>                           | 16               | SS                  | SS                    |                            |                           |
|                                                                |                                       | --                                  | 0                | -                   | -                     |                            |                           |
|                                                                | 46-                                   | <i>TT</i>                           | 106              | FF                  | FF                    |                            |                           |
|                                                                |                                       | <i>T-</i>                           | 37               | SS                  | SS                    |                            |                           |
|                                                                |                                       | --                                  | 0                | FF                  | FF                    |                            |                           |
|                                                                | --                                    | <i>TT</i>                           | 52               | FF                  | FF                    |                            |                           |
|                                                                |                                       | <i>T-</i>                           | 15               | FF                  | FF                    |                            |                           |
|                                                                |                                       | --                                  | 0                | -                   | -                     |                            |                           |
|                                                                |                                       | --                                  | 0                | -                   | -                     |                            |                           |
| <i>A4-A6</i> <sup>t</sup> #11 ×<br><i>TPR</i> <sup>t</sup> #18 | 4646                                  | <i>TT</i>                           | 41               | FF                  | FF                    | 0.85                       | 287.08***                 |
|                                                                |                                       | <i>T-</i>                           | 11               | SS                  | SS                    |                            |                           |
|                                                                |                                       | --                                  | 0                | -                   | -                     |                            |                           |
|                                                                | 46-                                   | <i>TT</i>                           | 72               | FF                  | FF                    |                            |                           |
|                                                                |                                       | <i>T-</i>                           | 24               | SS                  | SS                    |                            |                           |
|                                                                |                                       | --                                  | 0                | FF                  | FF                    |                            |                           |
|                                                                | --                                    | <i>TT</i>                           | 35               | FF                  | FF                    |                            |                           |
|                                                                |                                       | <i>T-</i>                           | 8                | FF                  | FF                    |                            |                           |
|                                                                |                                       | --                                  | 0                | -                   | -                     |                            |                           |
|                                                                |                                       | --                                  | 0                | -                   | -                     |                            |                           |

222 Note: The segregation data of *SIA4-SIA6*<sup>t</sup>#19 × *SITPR*<sup>t</sup>#13 (*A4-A6*<sup>t</sup>#19 × *TPR*<sup>t</sup>#13) are shown  
223 in Fig. 1e. \*\*\*, significance at  $P < 0.001$  in the Chi-square test. Source data are provided as a  
224 Source Data file.

225  
226  
227  
228  
229  
230  
231  
232  
233  
234  
235  
236  
237  
238  
239  
240

241 **Supplementary Table 6. Segregation analysis of *SI* and *TPR*<sup>t</sup> in F<sub>2</sub> populations**  
 242 **derived from the cross *TPR*<sup>t</sup> × *NIL-g*.**

| F <sub>2</sub> Population                  | <i>SI</i><br>genotype | <i>TPR</i> <sup>t</sup><br>genotype | No. of<br>plants | Pollen<br>fertility | Spikelet<br>fertility | $\chi^2_{(SI)}$<br>(4:4:1) | $\chi^2_{(T)}$<br>(4:4:1) |
|--------------------------------------------|-----------------------|-------------------------------------|------------------|---------------------|-----------------------|----------------------------|---------------------------|
| <i>TPR</i> <sup>t</sup> #13 × <i>NIL-g</i> | <i>gg</i>             | <i>TT</i>                           | 36               | FF                  | FF                    | 1.05                       | 0.13                      |
|                                            |                       | <i>T-</i>                           | 60               | FF                  | FF                    |                            |                           |
|                                            |                       | <i>--</i>                           | 30               | FF                  | FF                    |                            |                           |
|                                            | <i>gs</i>             | <i>TT</i>                           | 61               | FF                  | FF                    |                            |                           |
|                                            |                       | <i>T-</i>                           | 68               | PF                  | PF                    |                            |                           |
|                                            |                       | <i>--</i>                           | 5                | SS                  | SS                    |                            |                           |
|                                            | <i>ss</i>             | <i>TT</i>                           | 35               | FF                  | FF                    |                            |                           |
|                                            |                       | <i>T-</i>                           | 3                | FF                  | FF                    |                            |                           |
|                                            |                       | <i>--</i>                           | 0                | -                   | -                     |                            |                           |
| <i>TPR</i> <sup>t</sup> #18 × <i>NIL-g</i> | <i>gg</i>             | <i>TT</i>                           | 19               | FF                  | FF                    | 1.62                       | 0.82                      |
|                                            |                       | <i>T-</i>                           | 45               | FF                  | FF                    |                            |                           |
|                                            |                       | <i>--</i>                           | 22               | FF                  | FF                    |                            |                           |
|                                            | <i>gs</i>             | <i>TT</i>                           | 40               | FF                  | FF                    |                            |                           |
|                                            |                       | <i>T-</i>                           | 43               | PF                  | PF                    |                            |                           |
|                                            |                       | <i>--</i>                           | 4                | SS                  | SS                    |                            |                           |
|                                            | <i>ss</i>             | <i>TT</i>                           | 26               | FF                  | FF                    |                            |                           |
|                                            |                       | <i>T-</i>                           | 2                | FF                  | FF                    |                            |                           |
|                                            |                       | <i>--</i>                           | 0                | -                   | -                     |                            |                           |

243 Notes: FF, fully fertile (> 90%); PF, partially fertile (70~75%); SS, semi-sterile (45~55%).

244 The segregation data of *SITPR*<sup>t</sup>#13 × *NIL-g* (*TPR*<sup>t</sup>#13 × *NIL-g*) are shown in Fig. 2. Source

245 data are provided as a Source Data file.

246

247

248

249

250

251

252

253

254

255

256



257  
258

**Supplementary Table 7. Segregation analysis of *SI* and *TPR<sup>t</sup>* in F<sub>2</sub> populations derived from the cross *TPR<sup>t</sup>* × *tpr*.**

| F <sub>2</sub> Population               | <i>SI</i><br>genotype             | <i>TPR<sup>t</sup></i><br>genotype | No. of<br>plants | Pollen<br>fertility | Spikelet<br>fertility | $\chi^2_{(SI)}$<br>(1:2:1) | $\chi^2_{(T)}$<br>(1:2:1) |
|-----------------------------------------|-----------------------------------|------------------------------------|------------------|---------------------|-----------------------|----------------------------|---------------------------|
| <i>TPR<sup>t</sup></i> #13 × <i>tpr</i> | <i>g<sup>m</sup>g<sup>m</sup></i> | <i>TT</i>                          | 60               | FF                  | FF                    | 0.07                       | 615.17***                 |
|                                         |                                   | <i>T-</i>                          | 7                | SS                  | SS                    |                            |                           |
|                                         |                                   | <i>--</i>                          | 0                | -                   | -                     |                            |                           |
|                                         | <i>g<sup>m</sup>s</i>             | <i>TT</i>                          | 123              | FF                  | FF                    |                            |                           |
|                                         |                                   | <i>T-</i>                          | 16               | SS                  | SS                    |                            |                           |
|                                         |                                   | <i>--</i>                          | 0                | FF                  | FF                    |                            |                           |
|                                         | <i>ss</i>                         | <i>TT</i>                          | 63               | FF                  | FF                    |                            |                           |
|                                         |                                   | <i>T-</i>                          | 5                | FF                  | FF                    |                            |                           |
|                                         |                                   | <i>--</i>                          | 0                | -                   | -                     |                            |                           |
| <i>TPR<sup>t</sup></i> #18 × <i>tpr</i> | <i>g<sup>m</sup>g<sup>m</sup></i> | <i>TT</i>                          | 46               | FF                  | FF                    | 0.50                       | 494.59***                 |
|                                         |                                   | <i>T-</i>                          | 6                | SS                  | SS                    |                            |                           |
|                                         |                                   | <i>--</i>                          | 0                | -                   | -                     |                            |                           |
|                                         | <i>g<sup>m</sup>s</i>             | <i>TT</i>                          | 106              | FF                  | FF                    |                            |                           |
|                                         |                                   | <i>T-</i>                          | 11               | SS                  | SS                    |                            |                           |
|                                         |                                   | <i>--</i>                          | 0                | FF                  | FF                    |                            |                           |
|                                         | <i>ss</i>                         | <i>TT</i>                          | 49               | FF                  | FF                    |                            |                           |
|                                         |                                   | <i>T-</i>                          | 8                | FF                  | FF                    |                            |                           |
|                                         |                                   | <i>--</i>                          | 0                | -                   | -                     |                            |                           |

259 Notes: FF, fully fertile (> 90%); SS, semi-sterile (45~55%). The segregation data of  
260 *SITPR<sup>t</sup>*#13 × *s1tpr* (*TPR<sup>t</sup>*#13\_ × *tpr*) are given in Fig. 3e. \*\*\*, significance at  $P < 0.001$  in the  
261 Chi-square test. Source data are provided as a Source Data file.

262  
263  
264  
265  
266  
267  
268  
269  
270  
271  
272

**Supplementary Table 8. Primers used in this study.**

| <b>Primer Name</b>        | <b>Sequence (5' – 3')</b>                          | <b>Purpose</b>                                        |                                          |
|---------------------------|----------------------------------------------------|-------------------------------------------------------|------------------------------------------|
| TPR-linkF                 | CAGCTATGACCATGATTACGAATTCGCTTGTTCCCATGGATAGCATGAGC | Transgenic constructs for complementation test        |                                          |
| TPR-linkR                 | CTGCAGGTCGACTCTAGAGGATCCGACATTGGAGGCAAGCTCC        |                                                       |                                          |
| TPR-A6-linkF              | GGAGCTTGCCCTCCAATGTCCGAGGATTACGAGGATGATCTG         |                                                       |                                          |
| TPR-A6-linkR              | CTGCAGGTCGACTCTAGAGGTCACCTCAACGTGATCAGC            |                                                       |                                          |
| A4-linkF                  | CAGCTATGACCATGATTACGAATTCGATAGAGCGGCGGAAGATACGAG   |                                                       |                                          |
| A4-linkR                  | CTGCAGGTCGACTCTAGAGACGCGTCTCCCTAAGCTCGCGAGCTTTGTG  |                                                       |                                          |
| A6-linkF                  | CAGCTATGACCATGATTACGAATTCACATGTCAGCTGCCACGTCAAC    |                                                       |                                          |
| A6-linkR                  | CTGCAGGTCGACTCTAGAGGATCCTGATCTCCTACCTTGCACTC       |                                                       |                                          |
| A4-A6-linkF               | GACAAAGCTCGCGAGCTTAGGGAGACGGGAGGATTACGAGGATGATCTG  |                                                       |                                          |
| A4-A6-linkR               | CTGCAGGTCGACTCTAGAGAGTCACTCCAACGTGATCAGC           |                                                       |                                          |
| a2F                       | GCCGGAGGCTACGATGCGGGCAGT                           |                                                       | Knockout editing                         |
| a2R                       | AAACACTGCCCGCATCGTAGCCTC                           |                                                       |                                          |
| a3F                       | GCCGAATAATCATCTCGGTGCAAC                           |                                                       |                                          |
| a3R                       | AAACGTTGCACCGAGATGATTATT                           |                                                       |                                          |
| a4F                       | GCCGTGATAGAGCCCAAGAATCGG                           |                                                       |                                          |
| a4R                       | AAACCCGATTCTTGGGCTCTATCA                           |                                                       |                                          |
| a5F                       | GCCGCAATTGCAGGGCGTACGATC                           |                                                       |                                          |
| a5R                       | AAACGATCGTACGCCCTGCAATTG                           |                                                       |                                          |
| a6F                       | GCCGAGACGAGCGCTGAGCTCGCA                           |                                                       |                                          |
| a6R                       | AAACTGCGAGCTCAGCGCTCGTCT                           |                                                       |                                          |
| LBF                       | TTCGATGATGCAGCTTGGGCGCAG                           | Segregation analysis                                  |                                          |
| TPR <sup>t</sup> #13-P1   | GAGATGCCATCCTATGTAAC                               |                                                       |                                          |
| TPR <sup>t</sup> #13-P2   | CTGTGCTGATTGACCAATCACTG                            |                                                       |                                          |
| TPR <sup>t</sup> #18-P1   | GCACTGGCTATCACCTGTG                                |                                                       |                                          |
| TPR <sup>t</sup> #18-P2   | GGAAGTGAATTATTGATCACTC                             |                                                       |                                          |
| A4-A6 <sup>t</sup> #11-P1 | GACGGTCAAACATTTAGACAG                              |                                                       |                                          |
| A4-A6 <sup>t</sup> #11-P2 | GGTGTGGCAAGTATGGTATC                               |                                                       |                                          |
| A4-A6 <sup>t</sup> #19-P1 | CTTCCCAGCGTGTGTATTATG                              |                                                       |                                          |
| A4-A6 <sup>t</sup> #19-P2 | GATCGGGTGTGCGTACTTG                                |                                                       |                                          |
| 2170F                     | GGACCTTTCTTAGGTTCTATTTAG                           |                                                       |                                          |
| 2170R                     | CTATAGCTTCTTAGGATTTGTAGC                           |                                                       |                                          |
| RTActinF                  | ACCTCATGAAGATCCTGACG                               |                                                       | Analysis of gene expression using RT-PCR |
| RTActinR                  | ACAGATAGGCCGGTTGAAAA                               |                                                       |                                          |
| RTA1F                     | ATGTCGAACAAGGCTACGAATTC                            |                                                       |                                          |
| RTA1R                     | CTAGTTCGATTTTGTGAGAGT                              |                                                       |                                          |
| RTA2F                     | GCAATTCTCTTTCTTCATCAAC                             |                                                       |                                          |
| RTA2R                     | CCACCGAGGACGCGGAAAC                                |                                                       |                                          |
| RTA3F                     | GGATGATTGGAATATTTTACATAGG                          |                                                       |                                          |
| RTA3R                     | GGTCAGGAAATTTTCTCTC                                |                                                       |                                          |
| RTA4F                     | ATGGCATCGAACATACAATCTG                             |                                                       |                                          |
| RTA4R                     | CTAGACTCTTTGCCGCTTCC                               |                                                       |                                          |
| RTA5F                     | CAATTCAGCTTGGAGGATTACGA                            |                                                       |                                          |
| RTA5R                     | GCGATGCCCTTAACTATAC                                |                                                       |                                          |
| RTA6F                     | ATGTCGAAGACAAATCCCAAC                              |                                                       |                                          |
| RTA6R                     | TCAATGCAGCGCATCAAGGAC                              |                                                       |                                          |
| qActinF                   | ACCACAGGTAGCAATAGGTA                               | Analysis of gene expression using quantitative RT-PCR |                                          |
| qActinR                   | CACATTCCAGCAGATGTGGA                               |                                                       |                                          |
| qTPRF                     | GAGATCTGCAAGATTCTAGC                               |                                                       |                                          |
| qTPRR                     | CTGTATTGAAGCTGGCCAGTA                              |                                                       |                                          |
| qA2F                      | CATCCTGCAAATAATTACAGC                              |                                                       |                                          |
| qA2R                      | GGACACAGCTGTCAAACCTG                               |                                                       |                                          |
| qA3F                      | GGATGATTGGAATATTTTACATAGG                          |                                                       |                                          |
| qA3R                      | GCAGATCCAAGGCAGCAAAG                               |                                                       |                                          |
| qA4F                      | TCTCCGGTTGCGCAAGGTCT                               |                                                       |                                          |
| qA4R                      | GGATCCCCAACAACTTGGAC                               |                                                       |                                          |
| qA5F                      | CAATTCAGCTTGGAGGATTACGA                            |                                                       |                                          |
| qA5R                      | GCGATGCCCTTAACTATAC                                |                                                       |                                          |
| qA6F                      | GGCAGCTTACCTTTGAACCATC                             |                                                       |                                          |

|               |                         |
|---------------|-------------------------|
| qA6R          | CCAACATATTCAGTCGACACAAC |
| Os01g0269000F | CACGATACCTACGGCCAATC    |
| Os01g0269000R | CAGCCCGTTCAGCATGTACAC   |
| Os02g0730000F | GACGGCGAGCAATTCAGAAG    |
| Os02g0730000R | CCTCCACCGTGCTGAACTTG    |
| Os04g0559400F | TGGGATGGACTGTGCAACTG    |
| Os04g0559400R | CACTGGAAGTATGGTCAGTAAG  |
| Os05g0125500F | GGACTGTGACAATGGTAAAG    |
| Os05g0125500R | CAC TAGTACCGGCTCCAATC   |
| Os12g0183100F | GGTGTGATGAAGATGAATCTG   |
| Os12g0183100R | CTCAGCAATCGCTCTTGCTC    |
| Os12g0605800F | CCTGTCATGGTTATGGAAGC    |
| Os12g0605800R | GTACAGGTCGTGAATCTCTG    |
| Os01g0600900F | CATCGCCTTCAGCTAAGCTAG   |
| Os01g0600900R | ACTACCGGTACAGATCTCAC    |
| Os02g0197600F | GTACGTGCGTATGCGTATATG   |
| Os02g0197600R | CCATGCGTGCAAATCAGTTG    |
| OS06G0320500F | CAAGTTCGAGGAGTACAAGC    |
| Os06g0320500R | GTTCTCGGGATGATGATGTC    |
| Os07g0577600F | GAGGAGTTCCTCAGGTGTG     |
| Os07g0577600R | GTGCTCCATCCACAATTACATC  |
| Os09g0346500F | CGTACGCCACCAACTTCGTC    |
| Os09g0346500R | CATCATCTCGTCGCACTAAAC   |
| Os11g0242800F | GAGTACTACCGGATCATCAAC   |
| Os11g0242800R | CGTAGGCCTGGATGAAGAAC    |

---
